# Supplementary material for: Computational study on novel natural compound inhibitor targeting IDH1_R132H
Source: publisher site journal article supplement (doi:10.18632/aging.204162), 2022-07-07
Supplement: Supplementary file [file aging-v14i13-204162-supplementary-material-SD1.pdf]

## SUPPLEMENTARY FIGURE

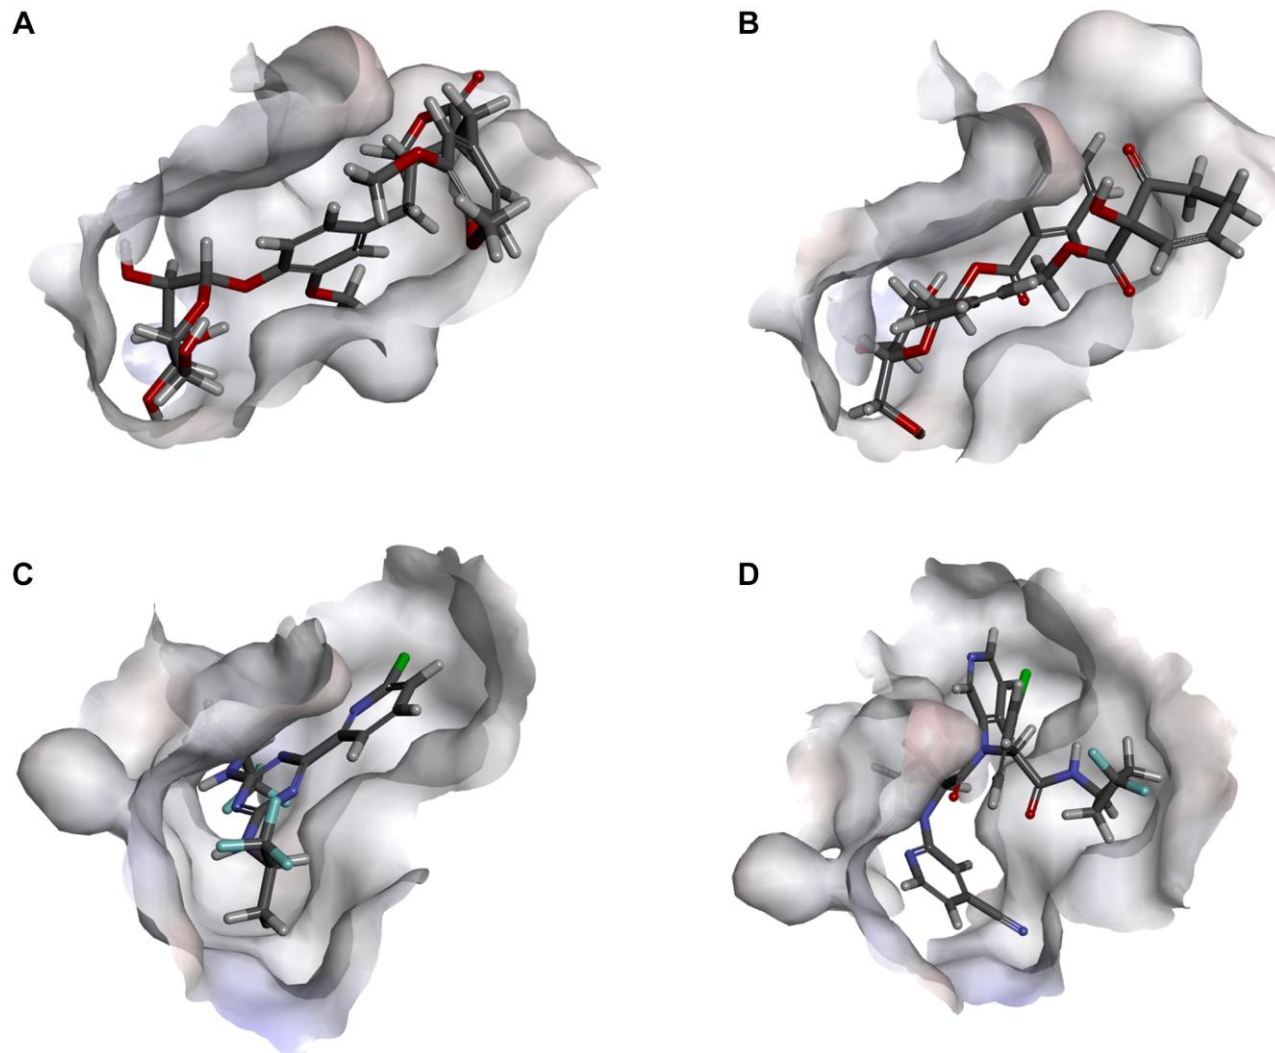

**Supplementary Figure 1. Schematic drawing of interactions between ligands and IDH1\_R132H and the ionizability surface of the junction pocket was added, blue represented basic ionization, red represented acid ionization, and ligands were shown in sticks, the structure around the ligand-receptor junction were shown in thinner sticks. (A) ZINC000004098459 (B) ZINC000049872393 (C) Vorasidenib (D) Ivosidenib.**
